# Supplementary material
Source: PubMed Central journal article supplement (PMC4690792)
Supplement: NIHMS703086-supplement-Supplemental_File.pdf [file NIHMS703086-supplement-Supplemental_File.pdf]

# THE SMOKING POPULATION IN THE US AND EU IS SOFTENING NOT HARDENING

Margarete C. Kulik, Stanton A. Glantz

## SUPPLEMENTARY MATERIAL

### QUESTIONS USED IN THE TUS-CPS (REPRESENTATIVE EXAMPLE FROM 2001/2002 SURVEY)<sup>1</sup>

**Prevalence** (question asked to those who have smoked at least 100 cigarettes in their lifetime):

S34 (Do/Does) (you/name) now smoke cigarettes every day, some days, or not at all?

<1> Every day

<2> Some days

<3> Not at all

**Quit attempts** (question asked to those who have smoked at least 100 cigarettes in their lifetime and indicated above that they are every day smokers)

S45 During the PAST 12 MONTHS, have you stopped smoking for one day or longer because you were TRYING to quit smoking?

<1> Yes

<2> No

**Quit Ratio:** Percent of ever smokers who have quit: The percentage of ever smokers who no longer smoke is calculated by dividing the number of former smokers (Persons who reported ever smoking at least 100 cigarettes but who do not currently smoke) by the number of current and former smokers (Persons who reported ever smoking at least 100 cigarettes and who currently smoke every day or on some days AND persons who reported ever smoking at least 100 cigarettes but who do not currently smoke).

**Consumption** (question asked to those who have smoked at least 100 cigarettes in their lifetime and indicated above that they are every day smokers)

S36 On the average, how many cigarettes do you now smoke a day?

ENTER NUMBER OF CIGARETTES A DAY

<01-99>

### QUESTIONS USED IN THE EUROBAROMETER SURVEYS

2006<sup>2</sup>

**Prevalence** (question asked to all EB respondents; Prevalence calculated as the sum of those who mentioned smoking at least one of the products below):

Q.B19\_1 You smoke packed cigarettes

Q.B19\_2 You smoke roll-up cigarettes

Q.B19\_3 You smoke cigars or a pipe

...

Which of the following applies to you?

0 Not mentioned

1 Mentioned

**Quit attempts** (question asked to all those who mentioned smoking at least one of the products listed in Q.B19\_1, Q.B19\_2 and Q.B19\_3, above (2006); Percentage of those with a quit attempt in the past 12 months is a total of those who answered 2, 3 and 4 to Q.B22)

Q.B22 Have you tried to give up smoking in the last 12 months? (IF YES) How many times have you tried to give up smoking in the last 12 months?

- 1 No, never
- 2 Yes, between 1 and 5 times
- 3 Yes, between 6 and 10 times
- 4 Yes, more than 10 times
- 5 DK

### 2009<sup>3</sup>

**Prevalence** (question asked to all EB respondents):

Q.D1 Regarding smoking cigarettes, cigars or a pipe, which of the following applies to you?

- 1 You smoke at the present time
- 2 You used to smoke but you have stopped
- 3 You have never smoked
- 4 DK

**Quit attempts** (question is based on “smokers” as in 1 in Q.D 1 (2009); Percentage of those with a quit attempt in the past 12 months is a total of those who answered 1, 2 and 3 to Q.D10)

Q.D10 Have you tried to quit smoking in the last 12 months?

- 1 Yes, once
- 2 Yes, between 2 and 5 times
- 3 Yes, more than 5 times
- 4 No
- 5 DK

**Consumption** (question asked to smokers of manufactured or hand-rolled cigarettes every day OR occasionally. These questions, in turn, were asked to those who indicated that they smoked at present in question QD1)

Q.D4A On average, how many cigarettes do you smoke each day?

- 0 Less than one
- 1 One cigarette
- XXX Continuous variable
- 97 Refusal
- 98 DK

### 2012<sup>4</sup>

**Prevalence** (question asked to all EB respondents):

QD 1 Regarding smoking cigarettes, cigars or a pipe, which of the following applies to you?

- 1 You currently smoke
- 2 You used to smoke but you have stopped
- 3 You have never smoked
- 4 DK

**Quit attempts** (question is based on “smokers” as in 1 in QD 1 (2012))

QD12 Have you ever tried to quit smoking? (MULTIPLE ANSWERS POSSIBLE)

Yes, in the last 12 months  
Yes, more than a year ago  
No, never  
DK

**Consumption** (question asked to those who said that they smoked boxed or hand-rolled cigarettes every day, weekly, monthly less than monthly or tried once or twice)

QD 8: On average, how many cigarettes do\ did you smoke each day?

XXX Cigarettes (Continuous variable)

## **REFERENCES**

1. TUS CPS 2001-02 Questionnaire. Available at [http://appliedresearch.cancer.gov/archive/tuscps/tuscps\\_english\\_2001-02.pdf](http://appliedresearch.cancer.gov/archive/tuscps/tuscps_english_2001-02.pdf). Downloaded August 2014.
2. Eurobarometer 66.2 (2006) Questionnaire. Available at <https://dbk.gesis.org/dbksearch/sdesc2.asp?no=4527>. Downloaded August 2014.
3. Eurobarometer 72.3 (2009) Questionnaire. Available at <https://dbk.gesis.org/dbksearch/sdesc2.asp?no=4977>. Downloaded August 2014.
4. Eurobarometer 77.1 (2012) Questionnaire. Available at <https://dbk.gesis.org/dbksearch/sdesc2.asp?no=5597>. Downloaded August 2014.
